# Supplementary material for: Pharmacological Strategy for Congenital Myasthenic Syndrome with CHRNE Mutations: A Meta-Analysis of Case Reports
Source: PubMed Central journal article supplement — Curr Neuropharmacol. 2021 Apr 29;19(5):718–29. doi: 10.2174/1570159X18666200729092332 (PMC8573743; doi:10.2174/1570159x18666200729092332), 2021-04-29
Supplement: CN-19-718_SD1.pdf [file CN-19-718_SD1.pdf]

## Supplementary Material

# Pharmacological Strategy for Congenital Myasthenic Syndrome with *CHRNE* Mutations: A Meta-Analysis of Case Reports

Kun Huang<sup>1</sup>, Yue-Bei Luo<sup>1</sup>, Fang-Fang Bi<sup>1,\*</sup> and Huan Yang<sup>1,\*</sup>

<sup>1</sup>Department of Neurology, Xiangya Hospital, Central South University, Changsha, Hunan, China

### Supplementary Tables

Supplementary Table S1. Overview of effect of pharmacologic treatment in *CHRNE*-mutated fast-channel syndrome.

| Case | onset(year)     | Age(year) | treatment                            | Effect            | Mutation              |
|------|-----------------|-----------|--------------------------------------|-------------------|-----------------------|
| 1[1] | 0               | 8         | AChEI                                | +                 | c.163T>C              |
| 2[2] | 0.6             | 2         | AChEI<br>AChEI +BA                   | ++<br>+++         | c.43T>C; c.113C>A     |
| 3[3] | 0               | 5         | AChEI                                | +                 | c.523G>A; c.544A>T    |
| 4[4] | 0               | 21        | AChEI<br>PDN<br>AChEI +PDN<br>others | +<br>++<br>+<br>- | c.362C>T; c.1233C>T   |
| 5[5] | 0               | 4         | AChEI                                | +                 | c.362C>T; c.428C>T    |
| 6[6] | early childhood | 39        | AChEI                                | +                 | c.382T>A; c.1254ins18 |
| 7[7] | N.M*            | N.M       | AChEI                                | +++               | c.610G>A              |
| 8[7] | N.M             | N.M       | AChEI                                | +++               | c.712C>T              |
| 9[7] | N.M             | N.M       | AChEI                                | +++               | c.778C>A; c.965G>A    |

Effect: (-) no effect; (+) partial, incomplete, moderate, modest or mild effect; (++) beneficial, positive or clear effect; (+++) remarkable, dramatical or satisfying effect. \*NM: not mentioned

Supplementary Table S2. Overview of effect of pharmacologic treatment in *CHRNE*-mutated slow-channel syndrome.

| Case   | Onset(year) | Age(year) | Treatment              | Effect         | Mutation          |
|--------|-------------|-----------|------------------------|----------------|-------------------|
| 1[7]   | 0           | 34        | BA + FLX               | ++             | c.865C>A (heter)  |
| 2[8]   | 0           | 16        | QUIN                   | +++            | p.L269F           |
| 3[8]   | 0           | 22        | QUIN                   | ++             | p.T264P           |
| 4[9]   | 2.5         | 29        | AChEI                  | -              | c.846G>T          |
| 5[10]  | 0           | 15        | AChEI<br>FLX           | +++<br>+       | c.805C>T (heter*) |
| 6[11]  | 17          | 27        | QUIN<br>AChEI          | +<br>+         | c.775G>C (heter)  |
| 7[11]  | childhood   | 53        | QUIN<br>AChEI          | +<br>+         | c.775G>C (heter)  |
| 8[11]  | childhood   | 28        | QUIN<br>AChEI          | +<br>+         | c.775G>C (heter)  |
| 9[11]  | N.M         | 24        | QUIN<br>AChEI          | +<br>+         | c.775G>C (heter)  |
| 10[12] | 2           | 19        | QUIN                   | ++             | p.V259L           |
| 11[12] | 0           | 15        | QUIN                   | ++             | p.V259L           |
| 12[12] | 0           | 20        | AChEI<br>FLX           | -<br>++        | p.L269F           |
| 13[12] | 0           | 18        | AChEI<br>FLX           | -<br>++        | p.L269F           |
| 14[13] | 6           | N.M**     | AChEI<br>FLX<br>others | ++<br>+<br>+++ | c.833_835delCTC   |
| 15[14] | 2           | 6         | AChEI +DAP<br>BA       | +<br>++        | c.850A>C (heter)  |
| 16[15] | 0           | 21        | AChEI                  | +              | c.854T>C          |
| 17[16] | 4           | 21        | AChEI<br>FLX           | -<br>+         | c.865C>T (heter)  |
| 18[16] | 11          | 24        | FLX                    | +              | c.865C>T (heter)  |
| 19[17] | 13          | 60        | BA                     | +              | c.721C>T (heter)  |
| 20[17] | 19          | 31        | BA + FLX               | +              | c.721C>T (heter)  |

Effect: (-) no effect; (+) partial, incomplete, moderate, modest or mild effect; (++) beneficial, positive or clear effect; (+++) remarkable, dramatical or satisfying effect. \*heter: heterogeneous; \*\*NM: not mentioned.

Supplementary Table S3. Overview of effect of pharmacologic treatment in *CHRNE*-mutated primary AChR deficiency.

| Case    | Onset(year)     | Age(year) | Treatment    | Effect  | Mutation                           |
|---------|-----------------|-----------|--------------|---------|------------------------------------|
| 1-30[7] | N.M             | N.M       | AChEI        | ++      | CHRNE (details not known)          |
| 31[14]  | 0.1             | 26        | AChEI        | +       | c.655_665del                       |
| 32[14]  | 1               | 38        | AChEI        | +       | c.786C>G                           |
| 33[14]  | 0.1             | 26        | AChEI        | +       | c.911T>G                           |
| 34[18]  | 1.5             | 55        | AChEI        | ++      | c.1101insT                         |
| 35[19]  | N.M*            | 29        | AChEI        | +       | c.1206ins19                        |
| 36[19]  | N.M             | 16        | AChEI        | +       | c.70insG                           |
| 37[19]  | N.M             | 12        | AChEI        | +       | c.70insG; g.IVS7+2T>C              |
| 38[19]  | N.M             | 20        | AChEI        | +       | c.1276delG                         |
| 39[19]  | N.M             | 19        | AChEI        | +       | c.1276delG                         |
| 40[19]  | N.M             | 13        | AChEI        | +       | c.59ins5                           |
| 41[20]  | N.M             | N.M       | AChEI        | ++      | c.1369delG                         |
| 42[20]  | N.M             | N.M       | AChEI        | ++      | 1369delG; p.Y15H                   |
| 43[20]  | N.M             | N.M       | AChEI        | ++      | 1369delG; p.R311Q                  |
| 44[20]  | N.M             | N.M       | AChEI        | ++      | 1369delG; c.509insA                |
| 45[20]  | N.M             | N.M       | AChEI        | ++      | p.R311Q                            |
| 46[21]  | 0               | 6         | AChEI        | +       | c.553del7; g.IVS9-1G>C             |
| 47[21]  | 0               | 18        | AChEI        | +       | c.553del7                          |
| 48[21]  | 0               | 10        | AChEI        | +       | c.553del7                          |
| 49[21]  | 0               | 39        | AChEI        | +       | c.553del7                          |
| 50[21]  | 0               | 16        | AChEI        | +       | c.553del7                          |
| 51[21]  | 0               | 30        | AChEI        | +       | c.553del7; c.1021ins20             |
| 52[21]  | 0               | 8         | AChEI        | +       | c.553del7; c.1098insG              |
| 53[21]  | 0               | 10        | AChEI        | +       | c.460G>T                           |
| 54[21]  | 0               | 33        | AChEI        | +       | c.470del13; g.IVS4-2A>C            |
| 55[22]  | 0               | 23        | PDN<br>AChEI | -<br>++ | c.511A>T                           |
| 56[22]  | 0               | 19        | PDN<br>AChEI | -<br>++ | c.511A>T                           |
| 57[22]  | 0               | 16        | PDN<br>AChEI | -<br>++ | c.511A>T                           |
| 58[23]  | 0               | 59        | AChEI        | +       | g.IVS6-1G>C                        |
| 59[23]  | 0               | 23        | AChEI        | +       | g.IVS9-1G>A                        |
| 60[23]  | 0               | 2.5       | AChEI        | +       | g.IVS10-9_c.1167dup16              |
| 61[23]  | 0               | 6         | AChEI        | +       | c.1259_g.IVS11+15del23; c.1033delG |
| 62[23]  | 0               | 44        | AChEI        | +       | c.857G->T; c.734C>T                |
| 63[24]  | early childhood | 18        | AChEI        | ++      | c.911delT; g.IVS5-16G>A            |
| 64[25]  | 2               | 14        | AChEI        | ++      | c.855C>T                           |
| 65[26]  | 0.6             | 21        | AChEI + DAP  | ++      | c.1293insG                         |
| 66[26]  | 0               | 23        | AChEI        | ++      | c.1293insG                         |
| 67[26]  | 0.3             | 18        | AChEI        | ++      | c.1293insG                         |
| 68[26]  | 0               | 9         | AChEI        | ++      | c.1293insG                         |
| 69[26]  | 0               | 37        | AChEI + DAP  | ++      | c.1293insG                         |
| 70[26]  | 0               | 8         | AChEI        | ++      | c.1293insG                         |

|         |           |     |                                    |                      |                           |
|---------|-----------|-----|------------------------------------|----------------------|---------------------------|
| 71[26]  | 0         | 22  | AChEI                              | ++                   | c.1293insG                |
| 72[26]  | 4         | 41  | AChEI                              | ++                   | c.1293insG                |
| 73[26]  | N.M       | 20  | AChEI                              | ++                   | c.1293insG                |
| 74[26]  | 4         | 17  | AChEI                              | ++                   | c.1293insG                |
| 75[26]  | 0         | 13  | AChEI                              | ++                   | c.1293insG                |
| 76[26]  | 0         | 13  | AChEI                              | -                    | c.1293insG                |
| 77[26]  | 0.3       | 5   | AChEI                              | ++                   | c.1293insG                |
| 78[27]  | 0         | 14  | AChEI                              | ++                   | c.1369delG; p.R311Q       |
| 79[27]  | 0         | 48  | AChEI                              | ++                   | c.1369delG                |
| 80[27]  | 0         | 24  | AChEI                              | +                    | c.1369delG; c.509insA     |
| 81[27]  | 1         | 74  | AChEI                              | ++                   | c.1369delG; p.R311Q       |
| 82[27]  | 3         | 80  | AChEI                              | +++                  | c.1369delG; p.R311Q       |
| 83[27]  | 0         | 53  | AChEI                              | +++                  | p.R64X; p.R311Q           |
| 84[28]  | 5         | 56  | AChEI                              | +                    | c.24T>G; c.874_876del3    |
| 85[29]  | 5         | 26  | AChEI                              | ++                   | c.70insG; c.127ins5       |
| 86[29]  | 4         | 23  | AChEI                              | ++                   | c.70insG; c.127ins5       |
| 87[29]  | 8         | 17  | AChEI                              | ++                   | c.70insG                  |
| 88[29]  | 5         | 19  | AChEI                              | ++                   | c.70insG                  |
| 89[29]  | 1         | 23  | AChEI                              | ++                   | c.70insG                  |
| 90[29]  | 0         | 18  | AChEI                              | ++                   | p.L11P                    |
| 91[29]  | 5         | N.M | AChEI                              | ++                   | c.1293insG                |
| 92[29]  | childhood | 33  | AChEI                              | ++                   | c.1293insG                |
| 93[29]  | 0         | 7   | AChEI                              | ++                   | c.1293insG; c.70insG      |
| 94[29]  | 0         | 12  | AChEI                              | ++                   | c.70insG; p.S235L         |
| 95[29]  | 1         | 32  | AChEI                              | ++                   | c.70insG                  |
| 96[29]  | 0         | 19  | AChEI                              | -                    | c.70insG                  |
| 97[29]  | 1         | 15  | AChEI                              | -                    | c.70insG                  |
| 98[29]  | 0         | 33  | AChEI                              | ++                   | p.R286M                   |
| 99[29]  | 3         | 16  | AChEI                              | ++                   | p.R286M                   |
| 100[30] | 0         | 21  | AChEI                              | ++                   | c.123_127dup5             |
| 101[30] | 0.4       | 17  | AChEI                              | ++                   | c.123_127dup5             |
| 102[30] | 0.4       | 13  | AChEI                              | ++                   | c.123_127dup5             |
| 103[31] | 0         | 63  | AChEI + BA                         | +                    | c.1293insG                |
| 104[32] | 0.4       | 56  | AChEI + DAP<br>BA<br>PDN<br>others | +<br>+++<br>+++<br>- | c.127ins5; c.1293insG     |
| 105[32] | 0.3       | 35  | PDN<br>BA<br>AChEI + DAP           | -<br>+++<br>+        | p.C142Y                   |
| 106[33] | 0         | 49  | AChEI<br>others                    | ++<br>-              | c.845C>G; c.798_800del    |
| 107[34] | 3         | 13  | AChEI                              | +++                  | CHRNE (details not known) |
| 108[34] | 5         | 5   | AChEI                              | +++                  | CHRNE (details not known) |
| 109[34] | 0         | 33  | AChEI                              | +++                  | CHRNE (details not known) |
| 110[35] | N.M       | 14  | BA<br>AChEI + DAP                  | +++<br>+             | c.554-560del; c.IV58-1G>A |
| 111[35] | N.M       | 18  | BA<br>AChEI + DAP                  | +++<br>+             | c.554-560del; c.IV58-1G>A |

|         |     |     |                   |           |                           |
|---------|-----|-----|-------------------|-----------|---------------------------|
| 112[35] | N.M | 36  | BA<br>AChEI + DAP | +++<br>+  | c.554-560del              |
| 113[35] | N.M | 32  | BA<br>AChEI + DAP | +++<br>+  | c.554-560del              |
| 114[35] | N.M | 53  | BA<br>AChEI + DAP | +++<br>+  | c.972+1G>T                |
| 115[35] | N.M | 15  | BA<br>AChEI + DAP | +++<br>+  | c.1267-32_1319del         |
| 116[36] | 4   | 34  | AChEI             | +++       | CHRNE (details not known) |
| 117[36] | 6   | N.M | AChEI             | +++       | CHRNE (details not known) |
| 118[37] | N.M | 4   | AChEI + DAP       | ++        | c.1327delG                |
| 119[37] | N.M | 5   | AChEI + DAP       | ++        | c.295C>T                  |
| 120[38] | 0.1 | 20  | AChEI             | +         | c.1267delG                |
| 121[38] | 9   | 16  | AChEI             | +         | c.1267delG                |
| 122[38] | 0.1 | 8   | AChEI             | +         | c.1267delG                |
| 123[38] | 1   | 8   | AChEI             | +         | c.1267delG                |
| 124[38] | 2   | 34  | AChEI             | +         | c.1267delG                |
| 125[38] | 2   | 30  | AChEI             | +         | c.1267delG                |
| 126[38] | 0.1 | 30  | AChEI + DAP       | ++        | c.1267delG                |
| 127[38] | 0.1 | 32  | AChEI + DAP       | +         | c.1267delG                |
| 128[38] | 0.5 | 20  | AChEI + DAP       | ++        | c.1267delG                |
| 129[39] | 2   | 17  | AChEI             | +         | c.183_187dup5             |
| 130[40] | 0.1 | 4   | BA                | +++       | c.475A>C                  |
| 131[40] | 1   | 20  | AChEI             | -         | c.704C>T; c.475A>C        |
| 132[40] | 1   | 13  | AChEI             | -         | c.704C>T; c.475A>C        |
| 133[41] | 0.4 | 21  | AChEI             | ++        | c.130insG; c.1353insG     |
| 134[41] | 0.1 | 19  | others            | ++        | c.130insG; c.1353insG     |
| 135[41] | 0.1 | 53  | AChEI + DAP       | ++        | c.1353insG                |
| 136[41] | 0.1 | 8   | AChEI             | ++        | c.1353insG                |
| 137[41] | 0   | 4   | AChEI             | ++        | c.865C > T                |
| 138[42] | N.M | N.M | AChEI<br>BA       | ++<br>+++ | c.43T>C; c.113C>A         |
| 139[43] | N.M | 30  | AChEI + BA        | ++        | c.130dupG                 |
| 140[43] | N.M | 29  | AChEI + BA        | ++        | c.130dupG                 |
| 141[43] | N.M | 12  | AChEI + BA        | ++        | c.130dupG                 |
| 142[43] | N.M | 28  | AChEI + BA        | ++        | c.130dupG                 |
| 143[43] | N.M | 19  | AChEI + BA        | ++        | c.130dupG                 |
| 144[43] | N.M | 13  | AChEI + BA        | ++        | c.130dupG                 |
| 145[43] | N.M | 32  | AChEI + BA        | ++        | c.130dupG (heter**)       |
| 146[43] | N.M | 12  | AChEI + BA        | ++        | c.130dupG                 |
| 147[43] | N.M | 37  | AChEI + BA        | ++        | c.130dupG                 |
| 148[43] | N.M | 10  | AChEI + BA        | ++        | c.130dupG                 |
| 149[43] | N.M | 25  | AChEI + BA        | ++        | c.130dupG                 |
| 150[43] | N.M | 4   | AChEI + BA        | ++        | c.130dupG                 |
| 151[43] | N.M | 34  | AChEI + BA        | ++        | c.130dupG                 |
| 152[43] | N.M | 14  | AChEI + BA        | ++        | c.130dupG                 |
| 153[43] | N.M | 64  | AChEI + BA        | ++        | c.130dupG; c.803-2A>G     |
| 154[43] | N.M | 54  | AChEI + BA        | ++        | c.130dupG; c.803-2A>G     |

|         |     |     |                 |            |                         |
|---------|-----|-----|-----------------|------------|-------------------------|
| 155[43] | N.M | 8   | AChEI + BA      | ++         | c.130dupG               |
| 156[43] | N.M | 16  | AChEI + BA      | ++         | c.130dupG; c.858_859dup |
| 157[43] | N.M | 7   | AChEI + BA      | ++         | c.130dupG; c.858_859dup |
| 158[43] | N.M | 38  | AChEI + BA      | ++         | c.130dupG               |
| 159[43] | N.M | 21  | AChEI + BA      | ++         | c.130dupG               |
| 160[43] | N.M | 28  | AChEI + BA      | ++         | c.130dupG               |
| 161[43] | N.M | 43  | AChEI + BA      | ++         | c.130dupG               |
| 162[43] | N.M | 34  | AChEI + BA      | ++         | c.130dupG               |
| 163[43] | N.M | 38  | AChEI + BA      | ++         | c.130dupG               |
| 164[43] | N.M | 18  | AChEI + BA      | ++         | c.130dupG               |
| 165[43] | N.M | 27  | AChEI + BA      | ++         | c.130dupG               |
| 166[43] | N.M | 34  | AChEI + BA      | ++         | c.130dupG               |
| 167[43] | N.M | 19  | AChEI + BA      | ++         | c.130dupG               |
| 168[43] | N.M | 5   | AChEI + BA      | ++         | c.130dupG; c.422T>A     |
| 169[44] | 0.2 | 3   | AChEI + PDN     | ++         | c.295C>T; c.442T>A      |
| 170[45] | 0.3 | 2   | AChEI<br>others | ++<br>++   | c.1327delG              |
| 171[45] | 1   | 2   | AChEI           | ++         | c.1327delG              |
| 172[45] | 1.3 | 4   | AChEI           | ++         | c.3G>A                  |
| 173[46] | 1   | 12  | AChEI           | ++         | c.452_454delAGG         |
| 174[46] | 1   | 8   | AChEI           | ++         | IVS7+2T>C(c.802+2T>C)   |
| 175[46] | 1.2 | 6   | AChEI<br>BA     | +<br>+++   | c.865C>T; c.872C>G      |
| 176[47] | 0.2 | 0.5 | others          | +++        | c.973G>T                |
| 177[48] | 0.2 | 35  | AChEI<br>BA     | +++<br>+++ | c.712C>T                |
| 178[48] | 0.4 | 34  | BA<br>others    | ++<br>+    | c.712C>T                |
| 179[48] | 1.5 | 25  | AChEI           | +++        | c.610G>A                |

Effect: (-) no effect; (+) partial, incomplete, moderate, modest or mild effect; (++) beneficial, positive or clear effect; (+++) remarkable, dramatical or satisfying effect. \*NM: not mentioned; \*\* heter: heterogeneous.

## REFERENCES

- Shen, X.M.; Brengman, J.M.; Edvardson, S.; Sine, S.M.; Engel, A.G. Highly fatal fast-channel syndrome caused by AChR epsilon subunit mutation at the agonist binding site. *Neurology*, **2012**, 79(5), 449-454.
- Webster, R.; Liu, W.W.; Chaouch, A.; Lochmuller, H.; Beeson, D. Fast-channel congenital myasthenic syndrome with a novel acetylcholine receptor mutation at the alpha-epsilon subunit interface. *Neuromuscul Disord*, **2014**, 24(2), 143-147.
- Sine, S.M.; Shen, X.M.; Wang, H.L.; Ohno, K.; Lee, W.Y.; Tsujino, A.; Bren, N.; Vajsar, J.; Engel, A.G. Naturally occurring mutations at the acetylcholine receptor binding site independently alter ACh binding and channel gating. *J Gen Physiol*, **2002**, 120(4), 483-496.
- Uchitel, O.; Engel, A.G.; Walls, T.J.; Nagel, A.; Atassi, M.Z.; Bril, V. Congenital myasthenic syndromes: II. Syndrome attributed to abnormal interaction of acetylcholine with its receptor. *Muscle Nerve*, **1993**, 16(12), 1293-1301.
- Ohno, K.; Wang, H.L.; Milone, M.; Bren, N.; Brengman, J.M.; Nakano, S.; Quiram, P.; Pruitt, J.N.; Sine, S.M.; Engel, A.G. Congenital myasthenic syndrome caused by decreased agonist binding affinity due to a mutation in the acetylcholine receptor epsilon subunit. *Neuron*, **1996**, 17(1), 157-170.
- Milone, M.; Wang, H.L.; Ohno, K.; Prince, R.; Fukudome, T.; Shen, X.M.; Brengman, J.M.; Griggs, R.C.; Sine, S.M.; Engel, A.G. Mode switching kinetics produced by a naturally occurring mutation in the cytoplasmic loop of the human acetylcholine receptor epsilon subunit. *Neuron*, **1998**, 20(3), 575-588.
- Durmus, H.; Shen, X.M.; Serdaroglu-Ofllazer, P.; Kara, B.; Parman-Gulsen, Y.; Ozdemir, C.; Brengman, J.; Deymeer, F.; Engel, A.G. Congenital myasthenic syndromes in Turkey: Clinical clues and prognosis with long term follow-up. *Neuromuscul Disord*, **2018**, 28(4), 315-322.
- Harper, C.M.; Engel, A.G. Quinidine sulfate therapy for the slow-channel congenital myasthenic syndrome. *Ann Neurol*, **1998**, 43(4), 480-484.
- Fidzianska, A.; Ryniewicz, B.; Shen, X.M.; Engel, A.G. IBM-type inclusions in a patient with slow-channel syndrome caused by a mutation in the AChR epsilon subunit. *Neuromuscul Disord*, **2005**, 15(11), 753-759.
- Colomer, J.; Muller, J.S.; Vernet, A.; Nascimento, A.; Pons, M.; Gonzalez, V.; Abicht, A.; Lochmuller, H. Long-term improvement of slow-channel congenital myasthenic syndrome with fluoxetine. *Neuromuscul Disord*, **2006**, 16(5), 329-333.
- Outteryck, O.; Richard, P.; Lacour, A.; Fournier, E.; Zephir, H.; Gaudon, K.; Eymard, B.; Hantai, D.; Vermersch, P.; Stojkovic, T. Novel epsilon subunit mutation of the muscle acetylcholine receptor causing a slow-channel congenital myasthenic syndrome. *J Neurol Neurosurg Psychiatry*, **2009**, 80(4), 450-451.
- Chaouch, A.; Muller, J.S.; Guergueltcheva, V.; Dussl, M.; Schara, U.; Rakocevic-Stojanovic, V.; Lindberg, C.; Scola, R.H.; Werneck, L.C.; Colomer, J.; Nascimento, A.; Vilchez, J.J.; Muelas, N.; Argov, Z.; Abicht, A.; Lochmuller, H. A retrospective clinical study of the treatment of slow-channel congenital myasthenic syndrome. *J Neurol*, **2012**, 259(3), 474-481.

- [13] Finlayson, S.; Spillane, J.; Kullmann, D.M.; Howard, R.; Webster, R.; Palace, J.; Beeson, D. Slow channel congenital myasthenic syndrome responsive to a combination of fluoxetine and salbutamol. *Muscle Nerve*, **2013**, *47*(2), 279-282.
- [14] Azuma, Y.; Nakata, T.; Tanaka, M.; Shen, X.M.; Ito, M.; Iwata, S.; Okuno, T.; Nomura, Y.; Ando, N.; Ishigaki, K.; Ohkawara, B.; Masuda, A.; Natsume, J.; Kojima, S.; Sokabe, M.; Ohno, K. Congenital myasthenic syndrome in Japan: ethnically unique mutations in muscle nicotinic acetylcholine receptor subunits. *Neuromuscul Disord*, **2015**, *25*(1), 60-69.
- [15] Shen, X.M.; Okuno, T.; Milone, M.; Otsuka, K.; Takahashi, K.; Komaki, H.; Giles, E.; Ohno, K.; Engel, A.G. Mutations Causing Slow-Channel Myasthenia Reveal That a Valine Ring in the Channel Pore of Muscle AChR is Optimized for Stabilizing Channel Gating. *Hum Mutat*, **2016**, *37*(10), 1051-1059.
- [16] Tan, J.Z.; Man, Y.; Xiao, F. A Missense Mutation in Epsilon-subunit of Acetylcholine Receptor Causing Autosomal Dominant Slow-channel Congenital Myasthenic Syndrome in a Chinese Family. *Chin Med J (Engl)*, **2016**, *129*(21), 2596-2602.
- [17] Angelini, C.; Lispi, L.; Salvaro, C.; Mostacciuolo, M.L.; Vazza, G. Clinical and genetic characterization of an Italian family with slow-channel syndrome. *Neurol Sci*, **2019**, *40*(3), 503-507.
- [18] Engel, A.G.; Ohno, K.; Bouzat, C.; Sine, S.M.; Griggs, R.C. End-plate acetylcholine receptor deficiency due to nonsense mutations in the epsilon subunit. *Ann Neurol*, **1996**, *40*(5), 810-817.
- [19] Ohno, K.; Anlar, B.; Ozdirim, E.; Brengman, J.M.; DeBleeker, J.L.; Engel, A.G. Myasthenic syndromes in Turkish kinships due to mutations in the acetylcholine receptor. *Ann Neurol*, **1998**, *44*(2), 234-241.
- [20] Ealing, J.; Webster, R.; Brownlow, S.; Abdelgany, A.; Oosterhuis, H.; Muntoni, F.; Vaux, D.J.; Vincent, A.; Beeson, D. Mutations in congenital myasthenic syndromes reveal an epsilon subunit C-terminal cysteine, C470, crucial for maturation and surface expression of adult AChR. *Hum Mol Genet*, **2002**, *11*(24), 3087-3096.
- [21] Ohno, K.; Milone, M.; Shen, X.M.; Engel, A.G. A frameshifting mutation in CHRNE unmasks skipping of the preceding exon. *Hum Mol Genet*, **2003**, *12*(23), 3055-3066.
- [22] Soltanzadeh, P.; Muller, J.S.; Ghorbani, A.; Abicht, A.; Lochmuller, H.; Soltanzadeh, A. An Iranian family with congenital myasthenic syndrome caused by a novel acetylcholine receptor mutation (CHRNE K171X). *J Neurol Neurosurg Psychiatry*, **2005**, *76*(7), 1039-1040.
- [23] Ohno, K.; Tsujino, A.; Shen, X.M.; Milone, M.; Engel, A.G. Spectrum of splicing errors caused by CHRNE mutations affecting introns and intron/exon boundaries. *J Med Genet*, **2005**, *42*(8), e53.
- [24] Muller, J.S.; Stucka, R.; Neudecker, S.; Zierz, S.; Schmidt, C.; Huebner, A.; Lochmuller, H.; Abicht, A. An intronic base alteration of the CHRNE gene leading to a congenital myasthenic syndrome. *Neurology*, **2005**, *65*(3), 463-465.
- [25] Richard, P.; Gaudon, K.; Fournier, E.; Jackson, C.; Bauche, S.; Haddad, H.; Koenig, J.; Echenne, B.; Hantai, D.; Eymard, B. A synonymous CHRNE mutation responsible for an aberrant splicing leading to congenital myasthenic syndrome. *Neuromuscul Disord*, **2007**, *17*(5), 409-414.
- [26] Richard, P.; Gaudon, K.; Haddad, H.; Ammar, A.B.; Genin, E.; Bauche, S.; Patureau-Jouas, M.; Muller, J.S.; Lochmuller, H.; Grid, D.; Hamri, A.; Nouioua, S.; Tazir, M.; Mayer, M.; Desnuelle, C.; Barois, A.; Chabrol, B.; Pouget, J.; Koenig, J.; Gouider-Khouja, N.; Hentati, F.; Eymard, B.; Hantai, D. The CHRNE 1293insG founder mutation is a frequent cause of congenital myasthenia in North Africa. *Neurology*, **2008**, *71*(24), 1967-1972.
- [27] Faber, C.G.; Molenaar, P.C.; Vles, J.S.; Bonifati, D.M.; Verschuuren, J.J.; van Doorn, P.A.; Kuks, J.B.; Wokke, J.H.; Beeson, D.; De Baets, M. AChR deficiency due to epsilon-subunit mutations: two common mutations in the Netherlands. *J Neurol*, **2009**, *256*(10), 1719-1723.
- [28] Brugnoli, R.; Maggi, L.; Canioni, E.; Moroni, I.; Pantaleoni, C.; D'Arrigo, S.; Riva, D.; Cornelio, F.; Bernasconi, P.; Mantegazza, R. Identification of previously unreported mutations in CHRNA1, CHRNE and RAPSN genes in three unrelated Italian patients with congenital myasthenic syndromes. *J Neurol*, **2010**, *257*(7), 1119-1123.
- [29] Mihaylova, V.; Scola, R.H.; Gervini, B.; Lorenzoni, P.J.; Kay, C.K.; Werneck, L.C.; Stucka, R.; Guergueltcheva, V.; von der Hagen, M.; Huebner, A.; Abicht, A.; Muller, J.S.; Lochmuller, H. Molecular characterisation of congenital myasthenic syndromes in Southern Brazil. *J Neurol Neurosurg Psychiatry*, **2010**, *81*(9), 973-977.
- [30] Salih, M.A.; Oystreck, D.T.; Al-Faky, Y.H.; Kabiraj, M.; Omer, M.I.; Subahi, E.M.; Beeson, D.; Abu-Amero, K.K.; Bosley, T.M. Congenital myasthenic syndrome due to homozygous CHRNE mutations: report of patients in Arabia. *J Neuroophthalmol*, **2011**, *31*(1), 42-47.
- [31] Maselli, R.A.; Arredondo, J.; Cagney, O.; Mozaffar, T.; Skinner, S.; Yousif, S.; Davis, R.R.; Gregg, J.P.; Sivak, M.; Konia, T.H.; Thomas, K.; Wollmann, R.L. Congenital myasthenic syndrome associated with epidermolysis bullosa caused by homozygous mutations in PLEC1 and CHRNE. *Clin Genet*, **2011**, *80*(5), 444-451.
- [32] Sadeh, M.; Shen, X.M.; Engel, A.G. Beneficial effect of albuterol in congenital myasthenic syndrome with epsilon-subunit mutations. *Muscle Nerve*, **2011**, *44*(2), 289-291.
- [33] Webster, R.; Maxwell, S.; Spearman, H.; Tai, K.; Beckstein, O.; Sansom, M.; Beeson, D. A novel congenital myasthenic syndrome due to decreased acetylcholine receptor ion-channel conductance. *Brain*, **2012**, *135*(Pt 4), 1070-1080.
- [34] Pavone, P.; Polizzi, A.; Longo, M.R.; Romano, K.; Vecchio, M.; Pratico, A.D.; Falsaperla, R. Congenital myasthenic syndromes: Clinical and molecular report on 7 Sicilian patients. *J Pediatr Neurosci*, **2013**, *8*(1), 19-21.
- [35] Rodriguez Cruz, P.M.; Palace, J.; Ramjattan, H.; Jayawant, S.; Robb, S.A.; Beeson, D. Salbutamol and ephedrine in the treatment of severe AChR deficiency syndromes. *Neurology*, **2015**, *85*(12), 1043-1047.
- [36] Santos, E.; Moreira, I.; Coutinho, E.; Goncalves, G.; Lopes, C.; Lopes Lima, J.; Leite, M.I. Congenital myasthenic syndrome due to mutation in CHRNE gene with clinical worsening and thymic hyperplasia attributed to association with autoimmune-myasthenia gravis. *Neuromuscul Disord*, **2015**, *25*(12), 928-931.
- [37] Verma, S.; Mazell, S.N.; Shah, D.A. Amifampridine phosphate in congenital myasthenic syndrome. *Muscle Nerve*, **2016**, *54*(4), 809-810.
- [38] Natera-de Benito, D.; Dominguez-Carral, J.; Muelas, N.; Nascimento, A.; Ortez, C.; Jaijo, T.; Arteaga, R.; Colomer, J.; Vilchez, J.J. Phenotypic heterogeneity in two large Roma families with a congenital myasthenic syndrome due to CHRNE 1267delG mutation. A long-term follow-up. *Neuromuscul Disord*, **2016**, *26*(11), 789-795.
- [39] Chang, T.; Cossins, J.; Beeson, D. A rare c.183\_187dupCTCAC mutation of the acetylcholine receptor CHRNE gene in a South Asian female with congenital myasthenic syndrome: a case report. *BMC Neurol*, **2016**, *16*(1), 195.
- [40] Ardisson, A.; Moroni, I.; Bernasconi, P.; Brugnoli, R. Congenital myasthenic syndrome: phenotypic variability in patients harbouring p.T159P mutation in CHRNE gene. *Acta Myol*, **2017**, *36*(1), 28-32.
- [41] Natera-de Benito, D.; Topf, A.; Vilchez, J.J.; Gonzalez-Quereda, L.; Dominguez-Carral, J.; Diaz-Manera, J.; Ortez, C.; Bestue, M.; Gallano, P.; Dusl, M.; Abicht, A.; Muller, J.S.; Senderek, J.; Garcia-Ribes, A.; Muelas, N.; Evangelista, T.; Azuma, Y.; McMacken, G.; Paipa Merchan, A.; Rodriguez Cruz, P.M.; Camacho, A.; Jimenez, E.; Miranda-Herrero, M.C.; Santana-Artiles, A.; Garcia-Campos, O.; Dominguez-Rubio, R.; Olive, M.; Colomer, J.; Beeson, D.; Lochmuller, H.; Nascimento, A. Molecular characterization of congenital myasthenic syndromes in Spain. *Neuromuscul Disord*, **2017**, *27*(12), 1087-1098.
- [42] McMacken, G.; Whittaker, R.G.; Evangelista, T.; Abicht, A.; Dusl, M.; Lochmuller, H. Congenital myasthenic syndrome with episodic apnoea: clinical, neurophysiological and genetic features in the long-term follow-up of 19 patients. *J Neurol*, **2018**, *265*(1), 194-203.

- [43] Estephan, E.P.; Sobreira, C.; Dos Santos, A.C.J.; Tomaselli, P.J.; Marques, W., Jr.; Ortega, R.P.M.; Costa, M.C.M.; da Silva, A.M.S.; Mendonca, R.H.; Caldas, V.M.; Zambon, A.A.; Abath Neto, O.; Marchiori, P.E.; Heise, C.O.; Reed, U.C.; Azuma, Y.; Topf, A.; Lochmuller, H.; Zanoteli, E. A common CHRNE mutation in Brazilian patients with congenital myasthenic syndrome. *J Neurol*, **2018**, *265*(3), 708-713.
- [44] Yang, K.; Cheng, H.; Yuan, F.; Meng, L.; Yin, R.; Zhang, Y.; Wang, S.; Wang, C.; Lu, Y.; Xi, J.; Lu, Q.; Chen, Y. CHRNE compound heterozygous mutations in congenital myasthenic syndrome: A case report. *Medicine (Baltimore)*, **2018**, *97*(17), e0347.
- [45] Anja, T.G.; David, N.; Tanja, G.; Tita, B.; Tanja, L.; Ales, M.; Damjan, O. Prevalence and genetic subtypes of congenital myasthenic syndromes in the pediatric population of Slovenia. *Eur J Paediatr Neurol*, **2020**.
- [46] Gul Mert, G.; Ozcan, N.; Herguner, O.; Altunbasak, S.; Incecik, F.; Bisgin, A.; Ceylaner, S. Congenital myasthenic syndrome in Turkey: clinical and genetic features in the long-term follow-up of patients. *Acta Neurol Belg*, **2019**.
- [47] Karimzadeh, P.; Parvizi Omran, S.; Ghaedi, H.; Omrani, M.D. A Novel c.973G>T Mutation in the epsilon-subunit of the Acetylcholine Receptor Causing Congenital Myasthenic Syndrome in an Iranian Family. *Balkan J Med Genet*, **2019**, *22*(1), 95-98.
- [48] Shen, X.M.; Brengman, J.M.; Shen, S.; Durmus, H.; Preethish-Kumar, V.; Yuceyar, N.; Vengalil, S.; Nalini, A.; Deymeer, F.; Sine, S.M.; Engel, A.G. Mutations causing congenital myasthenia reveal principal coupling pathway in the acetylcholine receptor epsilon-subunit. *JCI Insight*, **2018**, *3*(2).
